# Supplementary material
Source: MDPI journal article supplement (https://www.mdpi.com/2227-9717/10/10/2024)

# MODELING FOR THE EFFICIENT EFFLUENT DYE REMOVAL TO REUSE WATER AND SALT

## SUPPLEMENTARY INFORMATION

The results obtained in the 34 tests carried out are shown below.

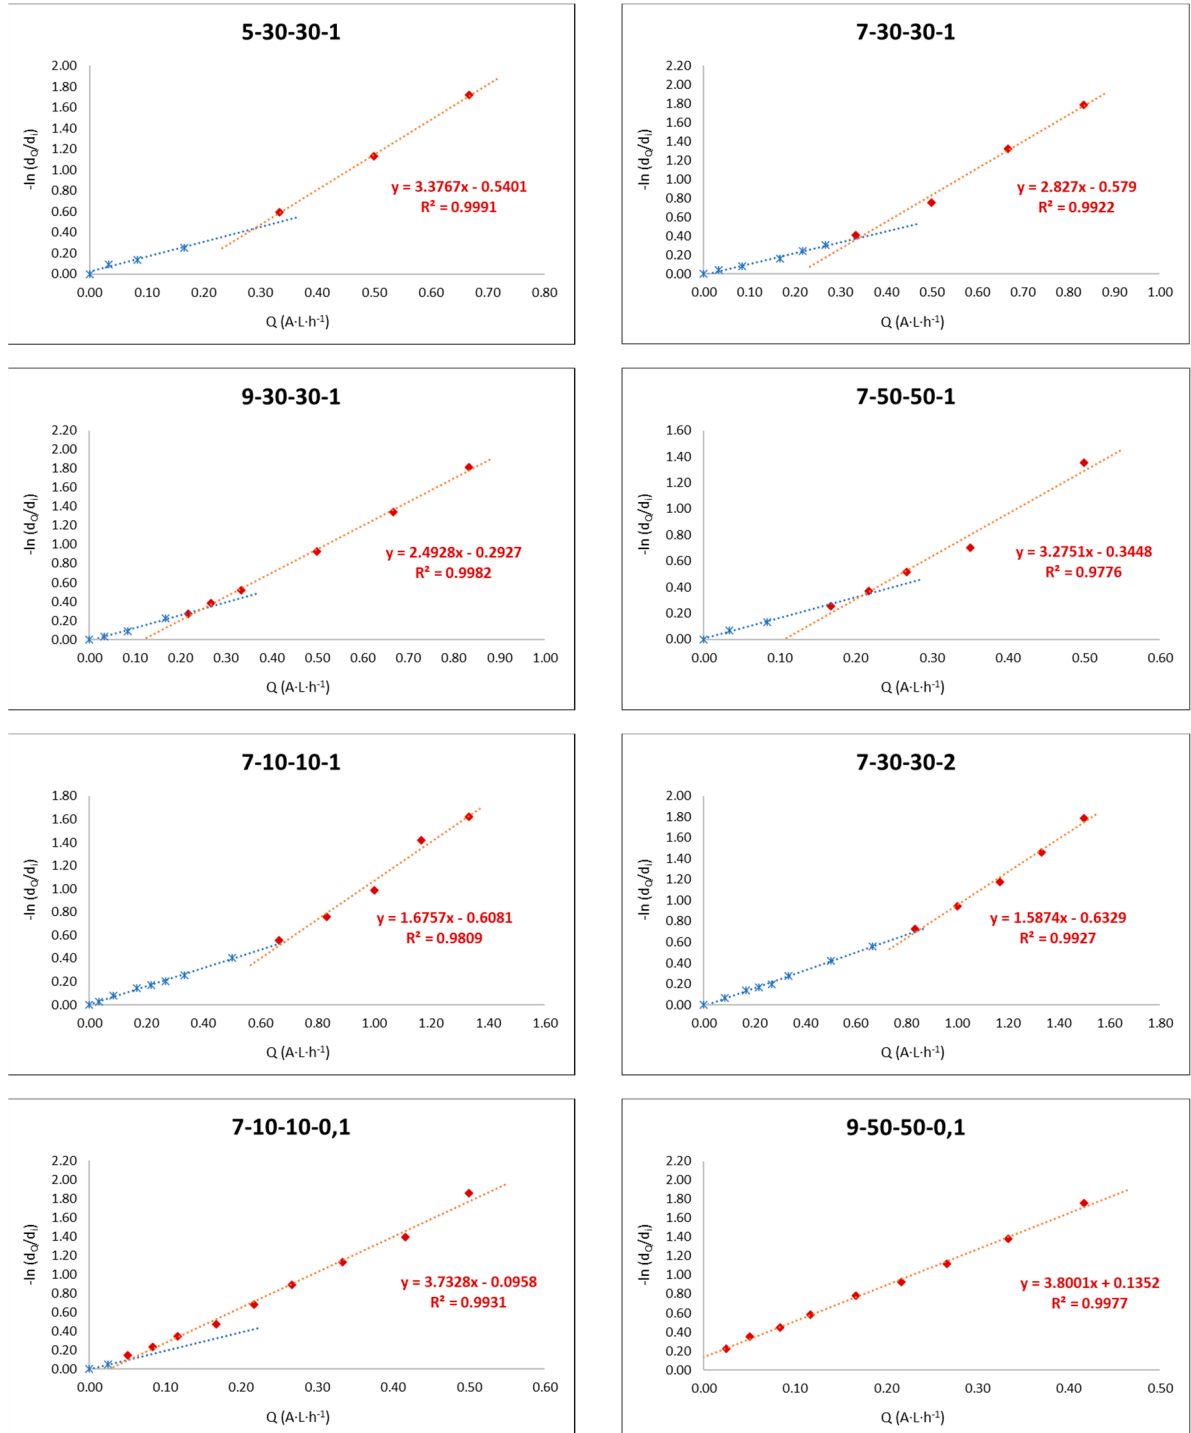

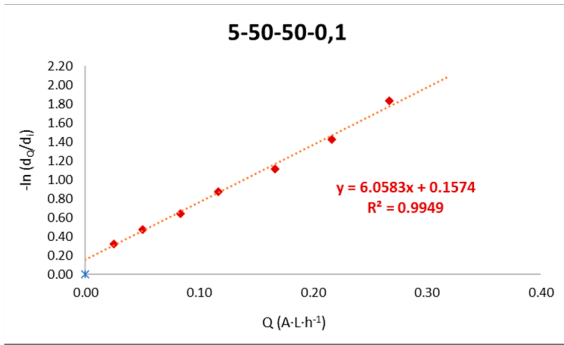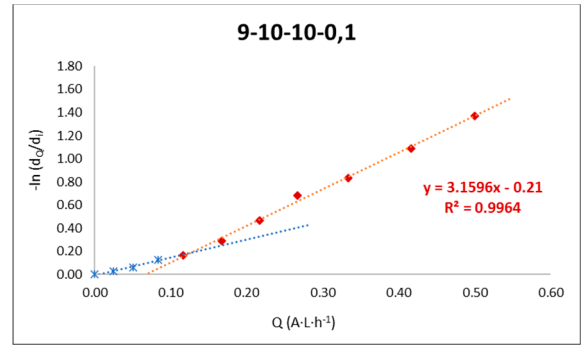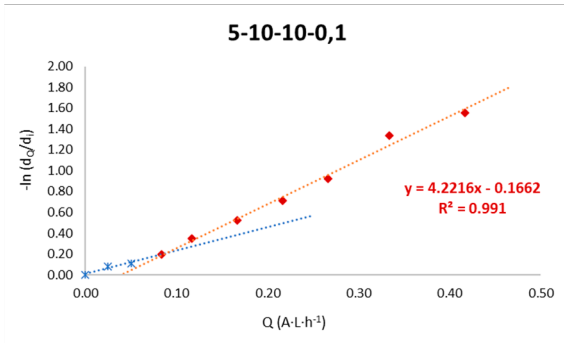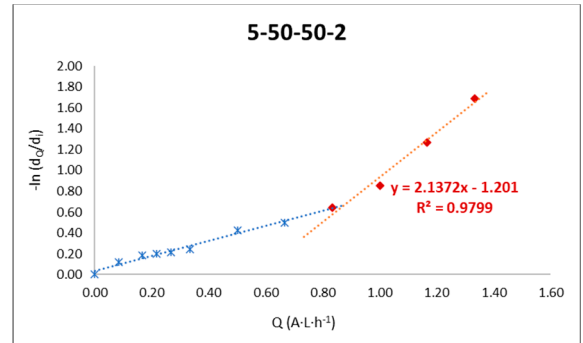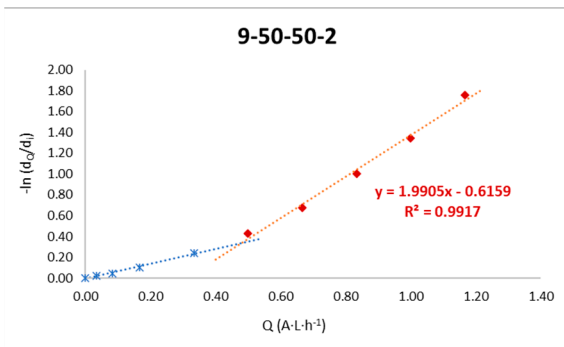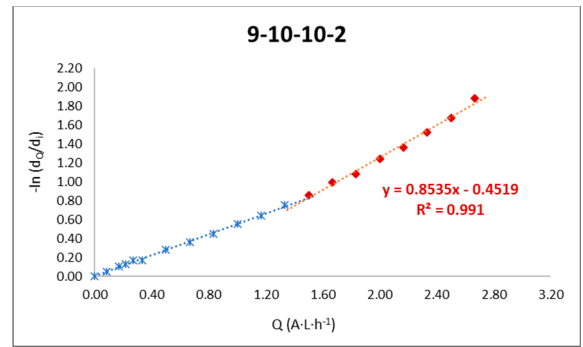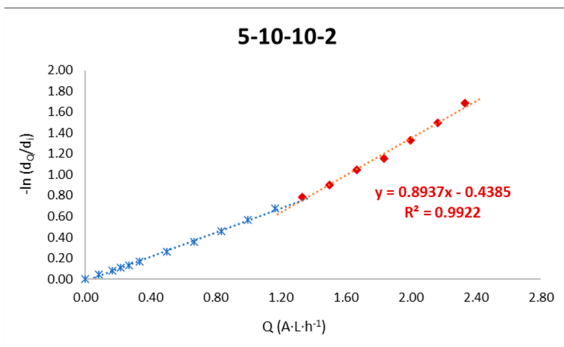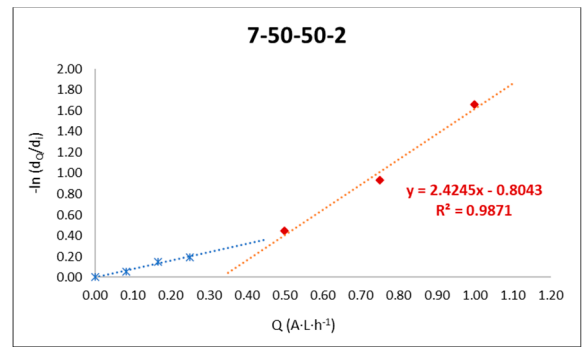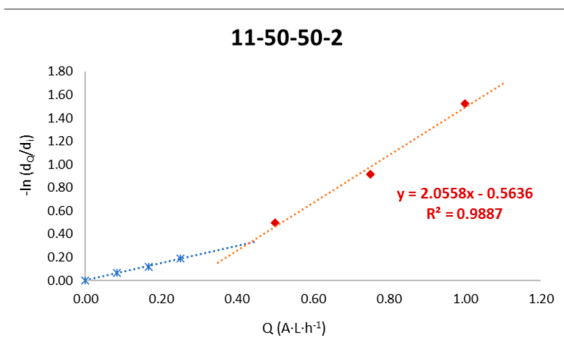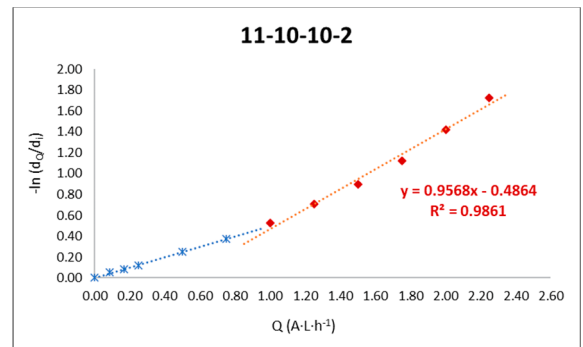

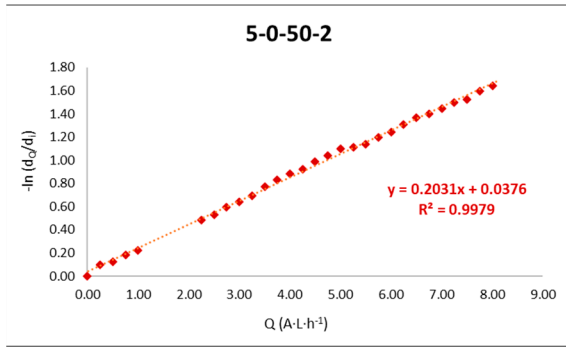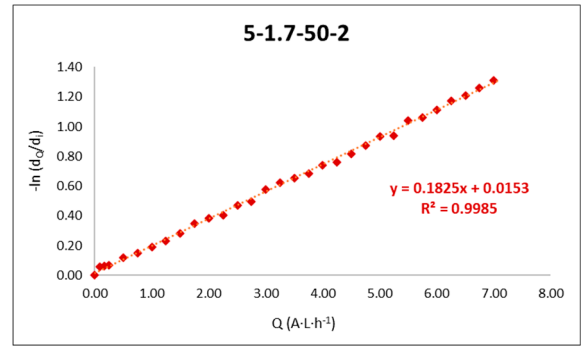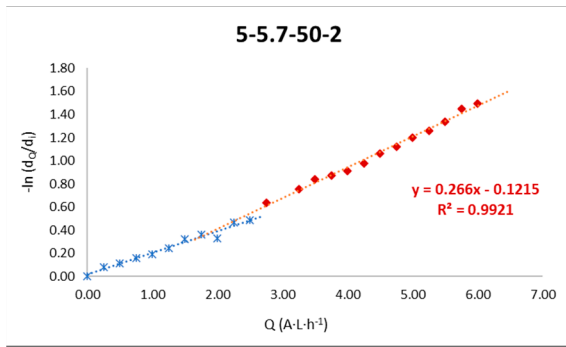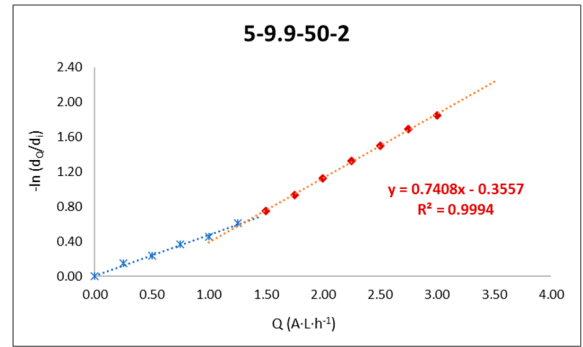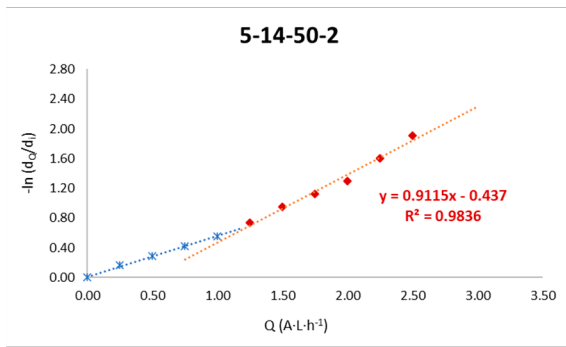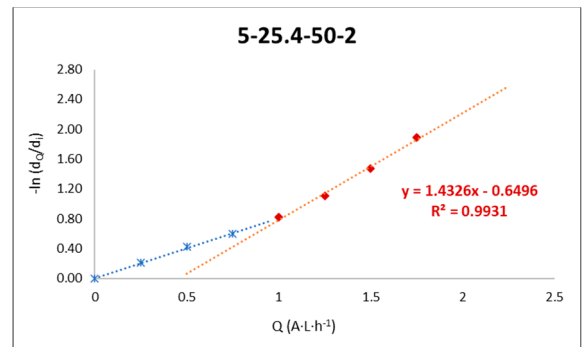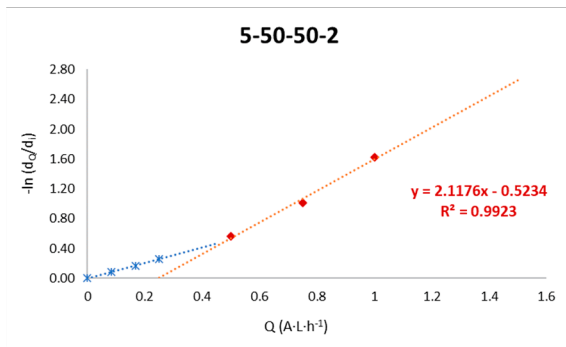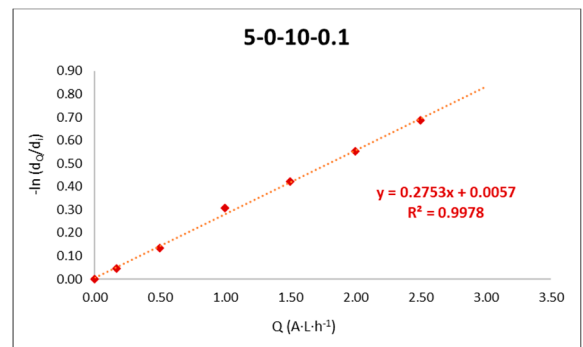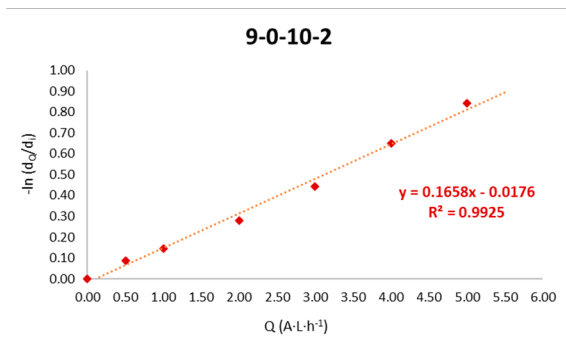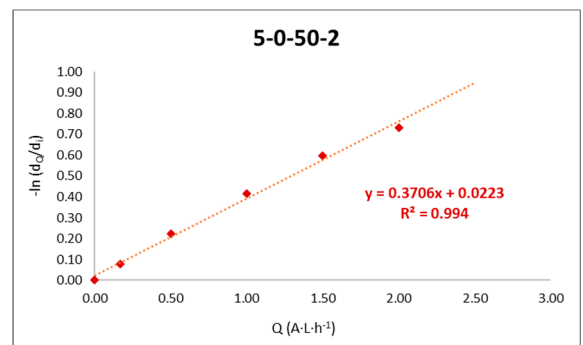

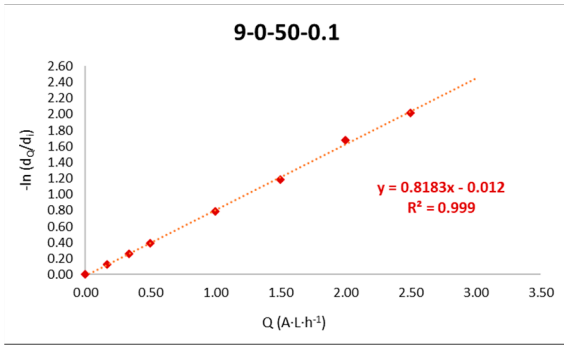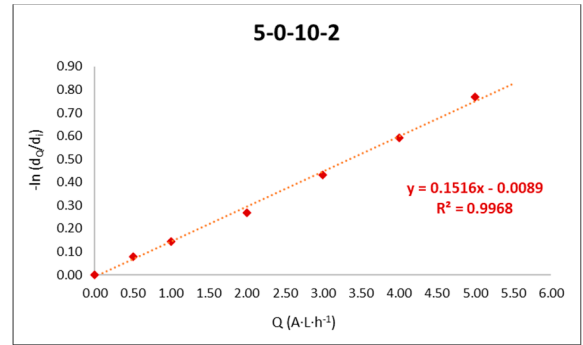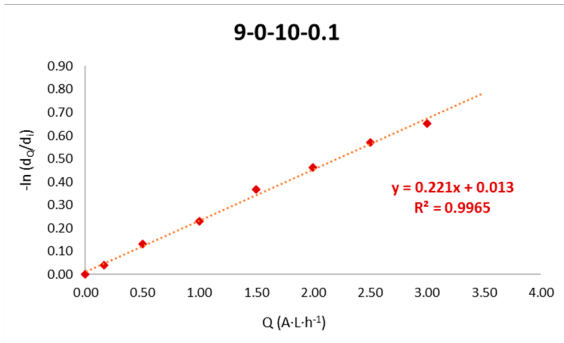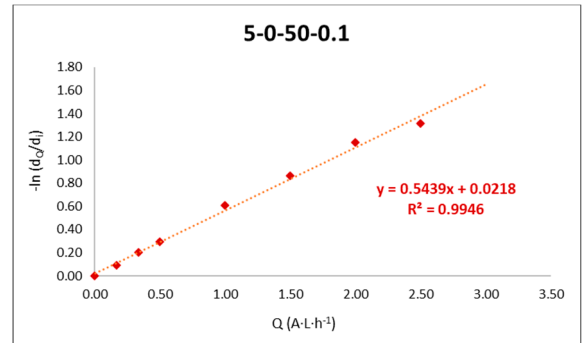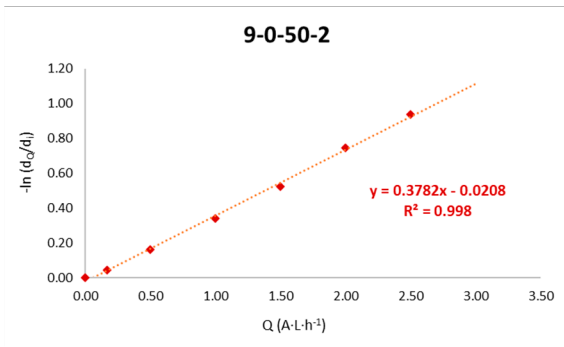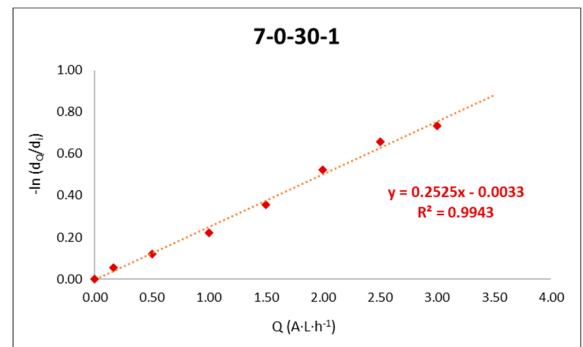

Supplement: s1 [file s1 › processes-1942880-supplementary.pdf]
